# Supplementary material for: Nanometer-thick lateral polyelectrolyte micropatterns induce macrosopic electro-osmotic chaotic fluid instabilities
Source: PubMed Central journal article supplement — Sci Rep. 2014 Mar 6;4:4294. doi: 10.1038/srep04294 (PMC3944711; doi:10.1038/srep04294), 2014-03-06
Supplement: srep04294-s1.pdf [file srep04294-s1.pdf]

# Supplementary Information for

## **Nanometer-thick lateral polyelectrolyte micropatterns induce macroscopic electro-osmotic chaotic fluid instabilities**

M. Wessling<sup>1,2</sup>, L. Garrigós Morcillo<sup>1</sup>, S. Abdu<sup>1</sup>

RWTH Aachen University

<sup>1</sup>AVT.CVT - Chair of Chemical Product and Process Engineering, Turmstr. 46, 52064 Aachen, Germany

<sup>2</sup>DWI - Leibniz Institute for Interactive Materials, Forckenbeckstr. 50, 52074 Aachen, Germany

## A. Screening of polyelectrolyte combinations

Six different polyelectrolyte combinations (Table S1) were screened, to quickly preselect the best combination for subsequent investigations of the effect of the number of bilayers and the microcontact printing. The criteria for the selection were: higher degree of hydrophobicity of the surface, lower plateau length and the absence of water splitting. A summary of the results are depicted in Figure S2 and Figure S3. On the basis of the screening experiments, the polyelectrolyte pair PAH(pH=10)/PAA(pH=3) was selected for further study.

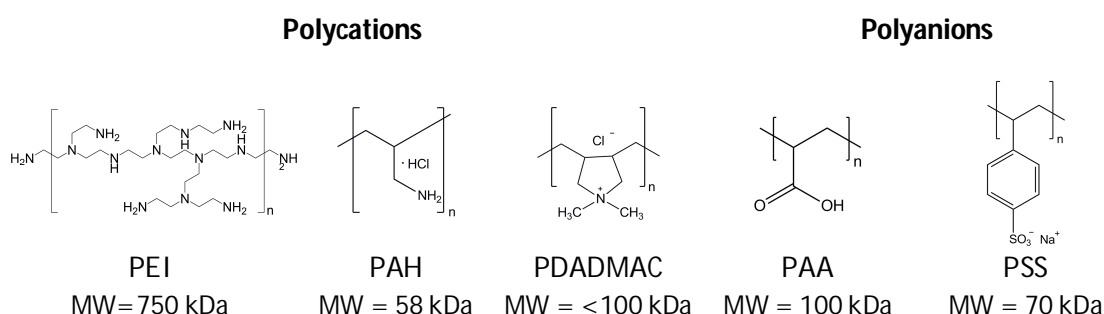

**Figure S1.** List of polyelectrolytes used for the screening experiments.

**Table S1.** Combination of polyelectrolytes used for the screening

| # | Polycation  | Polyanion  |
|---|-------------|------------|
| 1 | PAH (pH=10) | PSS        |
| 2 | PDADMAC     | PSS        |
| 3 | PEI         | PSS        |
| 4 | PAH (pH=10) | PAA (pH=3) |
| 5 | PDADMAC     | PAA (pH=3) |
| 6 | PEI         | PAA (pH=3) |

(a)

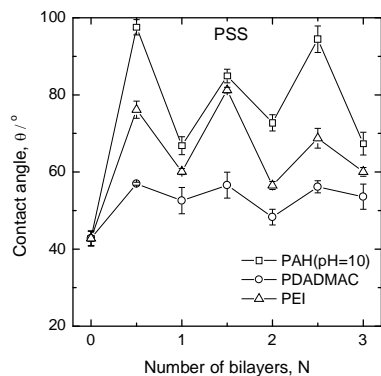

(b)

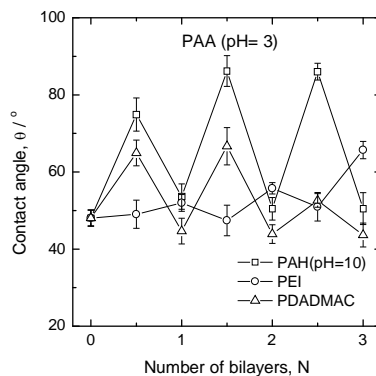

**Figure S2.** Contact angle results as a function of the number of bilayers of three different polycations in combination with (a) the polyanion PSS, (b) the polyanion PAA (pH = 3).

(a)

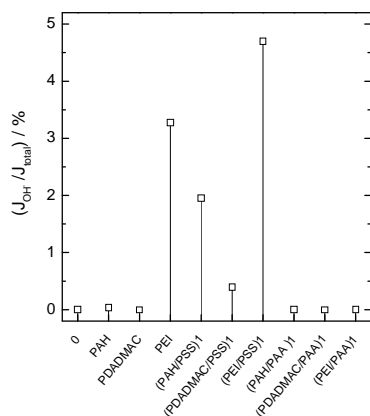

(b)

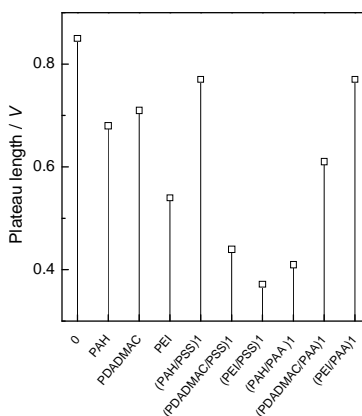

**Figure S3.** Results obtained from the i-V polarization curves of the screening experiments. (a) Percentage of the current carried by the water splitting products in relation to the total ion flux, during the i-V experiments. (b) Plateau lengths.

## B. LBL Surface Analysis (PAH/PAA multilayers on CMX)

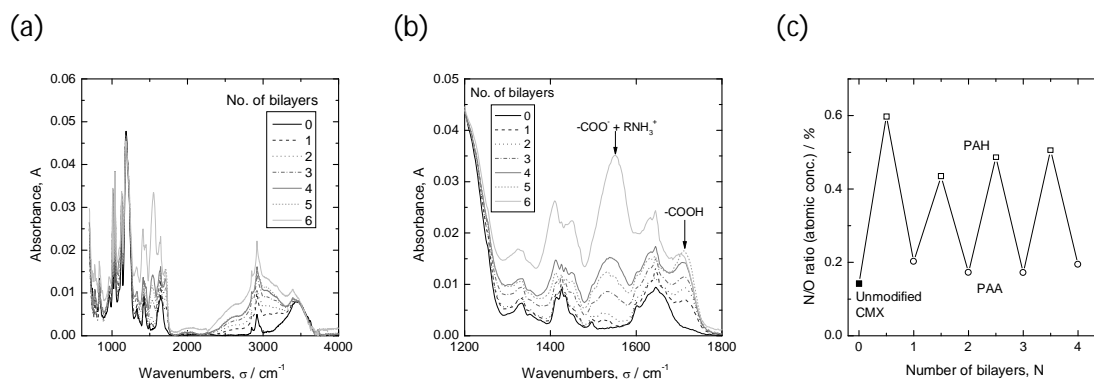

**Figure S4.** ATR-FTIR spectra of the CMX membrane coated with multilayers of PAH (pH=10) and PAA (pH=3) (a) whole spectra (b) zoomed to wave numbers around 1711  $\text{cm}^{-1}$  characteristic for  $-\text{COOH}$  groups, and around 1551  $\text{cm}^{-1}$  which could be an overlay of  $-\text{COO}^-$  and  $\text{RNH}_3^+$  signals. (c) N/O ratio against the number of bilayers obtained from elemental analysis of the XPS results.

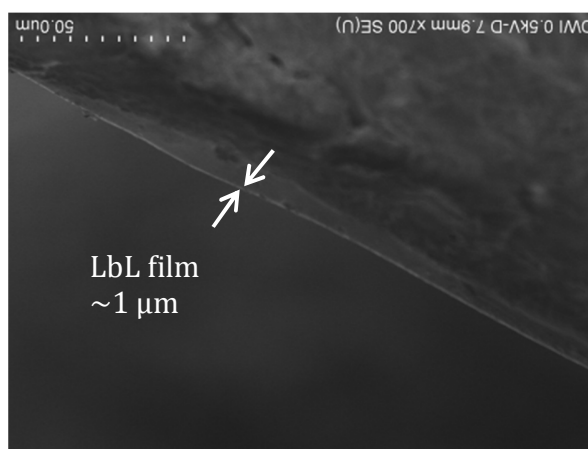

**Figure S5.** Cross-section scanning electron micrograph of CMX membrane modified with 10 bilayers of PAH (pH = 10) and PAA (pH=3).

## C. Microcontact printing

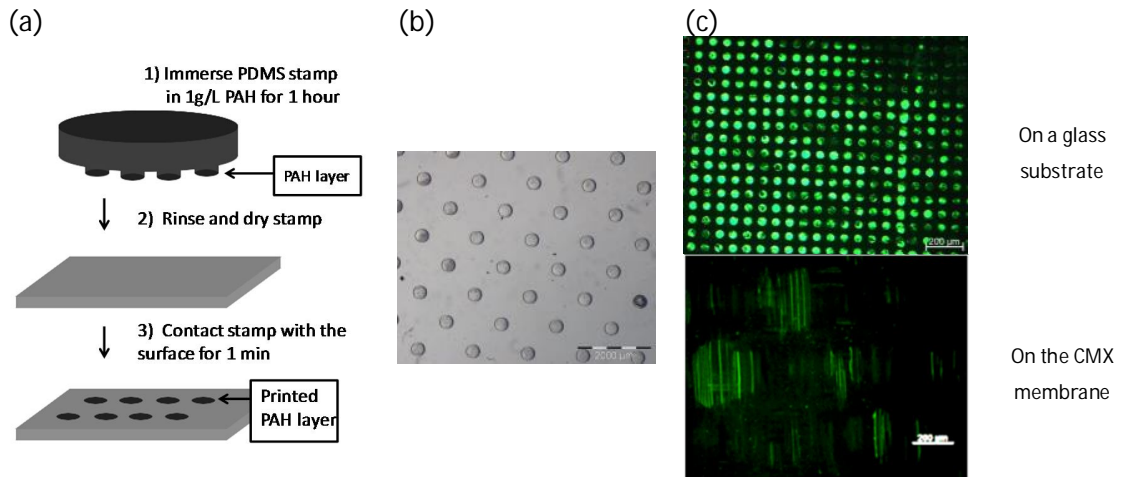

**Figure S6.** (a) Microcontact printing protocol. (b) A light microscopic image of the PDMS stamp used to print the patterns atop the CMX membrane. (c) Fluorescence micrographs (top) a sample image on a glass substrate; a different PDMS stamp was used to print the patterns (bottom) on CMX membrane.
